# Supplementary material for: Thin membrane-based potentiometric sensors for sensitive detection of polyions
Source: Royal Society of Chemistry journal article supplement (doi:10.1039/d2ay01223e), 2022-01-01
Supplement: d2ay01223e1.pdf [file d2ay01223e1.pdf]

**Supporting Information for**  
**Thin Membrane-Based Potentiometric Sensors for Sensitive Detection of**  
**Polyions**

Kaikai Wang <sup>a, b</sup>, Rongning Liang <sup>a, \*</sup>, Wei Qin <sup>a</sup>

<sup>a</sup> CAS Key Laboratory of Coastal Environmental Processes and Ecological Remediation, Yantai Institute of Coastal Zone Research (YIC), Chinese Academy of Sciences (CAS); Shandong Key Laboratory of Coastal Environmental Processes, YICCAS, Yantai, Shandong 264003, P. R. China.

<sup>b</sup> University of Chinese Academy of Sciences, Beijing 100049, P. R. China

\* Corresponding author. Fax: +86-535-2109000

E-mail address: [rnliang@yic.ac.cn](mailto:rnliang@yic.ac.cn)

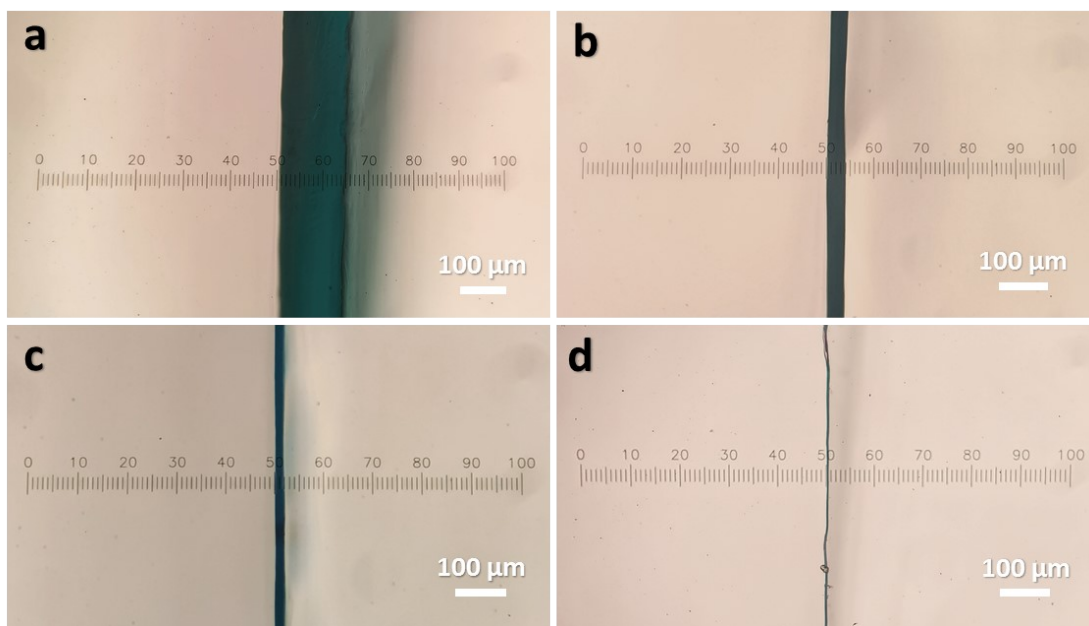

**Figure S1.** The membranes with different thicknesses observed by using a microscope after the membranes were stained with methylene blue: (a) 150  $\mu\text{m}$ , (b) 40  $\mu\text{m}$ , (c) 20  $\mu\text{m}$  and (d) 5  $\mu\text{m}$ .

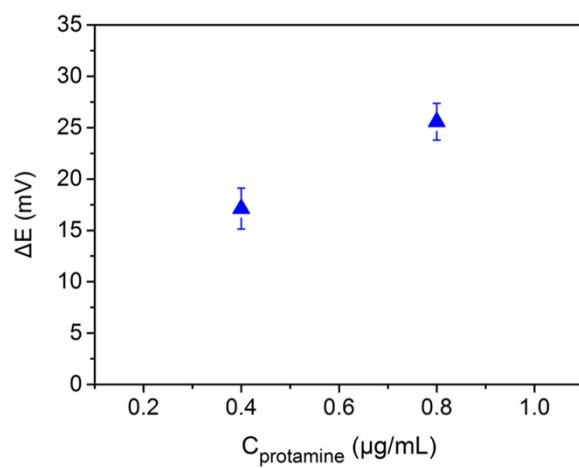

**Figure S2.** Potential responses of the 3- $\mu\text{m}$  membrane PSE to protamine in Tris buffer.

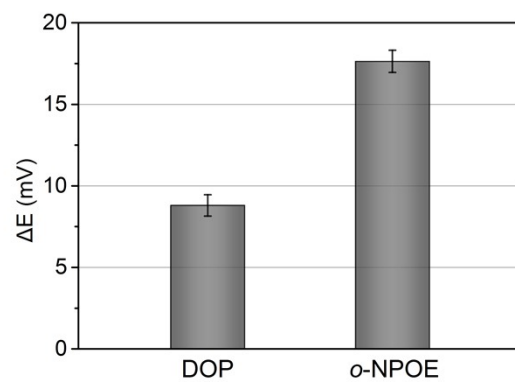

**Figure S3.** Effect of the plasticizer on the potential response of the thin membrane potentiometric sensor to 0.8  $\mu\text{g/mL}$  protamine. Each error bar represents one standard deviation for three measurements.

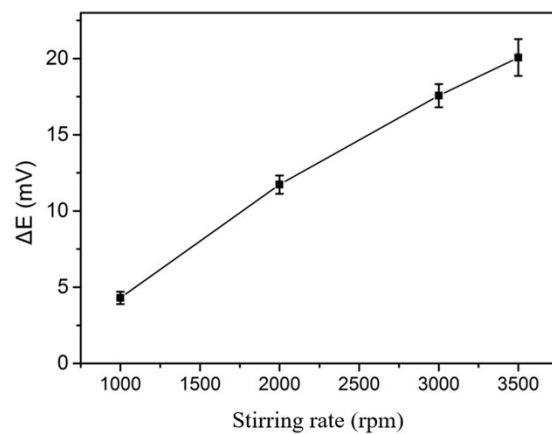

**Figure S4.** Influence of stirring rate on the potentiometric response of the thin membrane PSE to 0.8  $\mu\text{g/mL}$  protamine. Each error bar represents one standard deviation for three measurements.

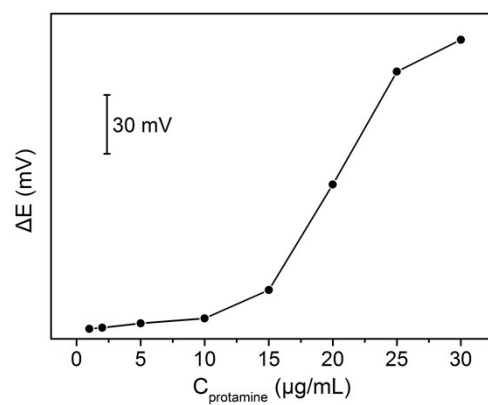

**Figure S5.** Potential responses of the classical thick-membrane PSE to protamine in Tris buffer. The potential value at 5 min was used for the quantification.
